# Supplementary material for: Two three-dimensional polyanionic clusters [M(P4Mo6)2] (M = Co, Zn) exhibiting excellent photocatalytic CO2 reduction performance
Source: Royal Society of Chemistry journal article supplement (doi:10.1039/d1dt00809a), 2021-01-01
Supplement: d1dt00809a1.pdf [file d1dt00809a1.pdf]

## Supporting Information

### **Two Three-Dimensional Polyanionic Clusters [M(P<sub>4</sub>Mo<sub>6</sub>)<sub>2</sub>] (M = Co, Zn) Exhibiting Excellent Photocatalytic CO<sub>2</sub> Reduction Performance**

Jia-Nian Li,<sup>a</sup> Ze-Yu Du,<sup>a</sup> Ning-Fang Li,<sup>a</sup> Ye-Min Han,<sup>a</sup> Ting-Ting Zang,<sup>a</sup> Mu-Xiu Yang,<sup>a</sup> Xiao-Mei Liu,<sup>a</sup> Ji-Lei Wang<sup>a</sup>, Hua Mei\*<sup>a</sup> and Yan Xu\*<sup>a,b</sup>

<sup>a</sup> College of Chemical Engineering, State Key Laboratory of Materials-Oriented Chemical Engineering, Nanjing Tech University, Nanjing 211800, P. R. China

<sup>b</sup> State Key Laboratory of Coordination Chemistry, School of Chemistry and Chemical Engineering, Nanjing University, Nanjing 210023, P. R. China

## Photoluminescence Properties

The solid-state emission/excitation spectra were measured with an FP-6500 spectrofluorimeter equipped with a 450 W xenon lamp as the excitation source. As shown in Fig. S1, compound **2** exhibits photoluminescence with an emission maximum at 420 nm upon excitation at 201 nm. Based on emission spectrum of bbi ligand in room temperature exhibiting one emission maximum at 398 nm.<sup>1,2</sup> In contrast to free ligands, red shifts of 22 nm have been observed upon the formation of compound **2** and the maximum emission band of **2** does not belong to intraligand charge transfer while should be possibly assigned to ligand-to-metal charge transfer.

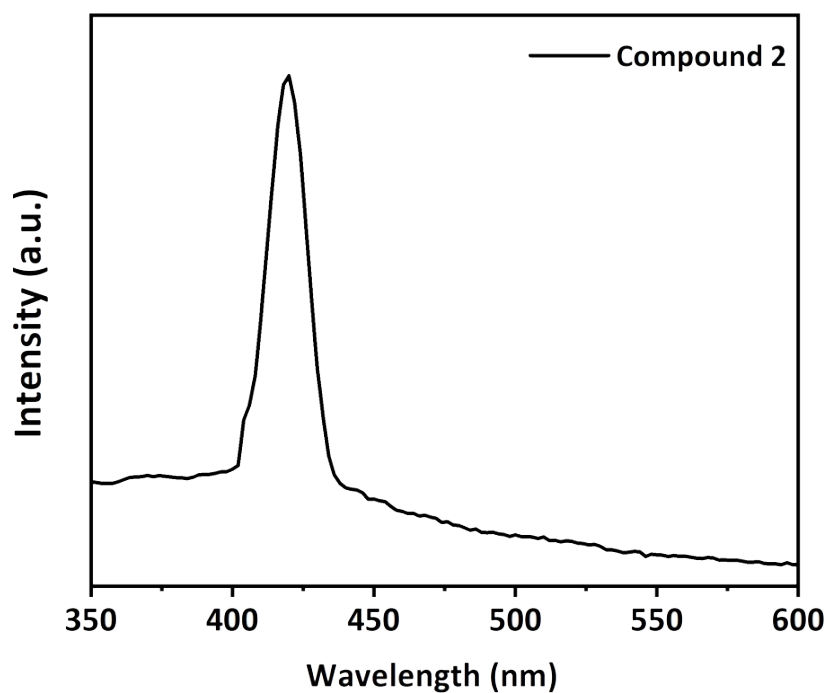

Fig. S1 Solid-state photoluminescent spectra of **2** at room temperature.

## Experimental Section

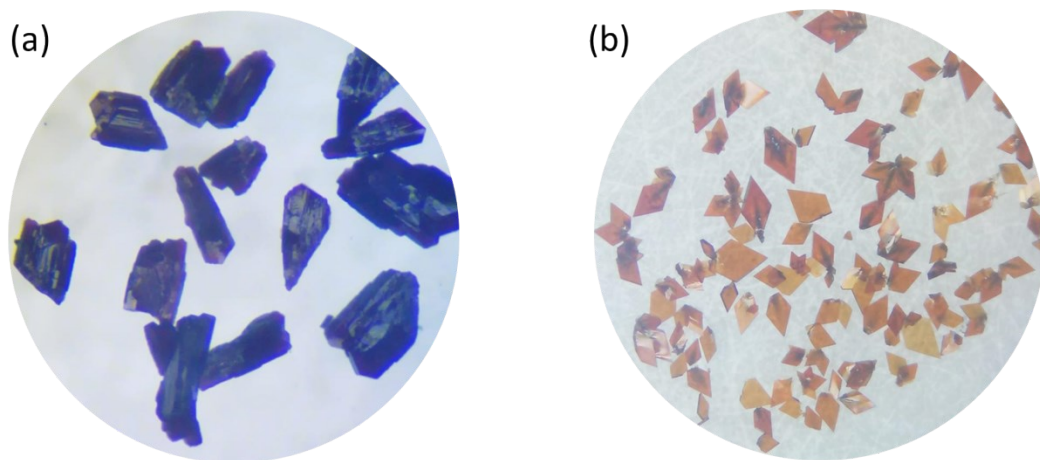

**Fig. S2** The images of compounds **1** and **2** under optical microscope.

## Structure

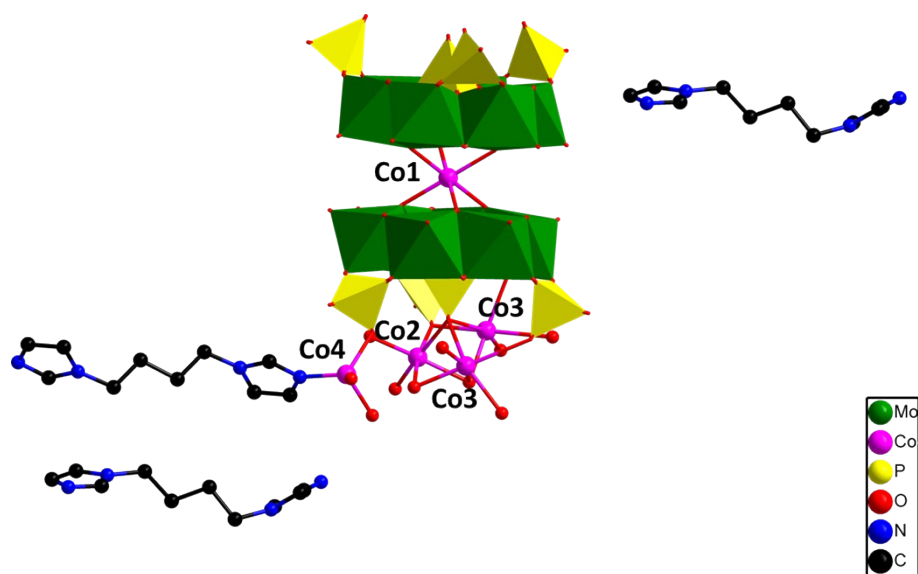

Fig. S3 The basic unit of compound 1.

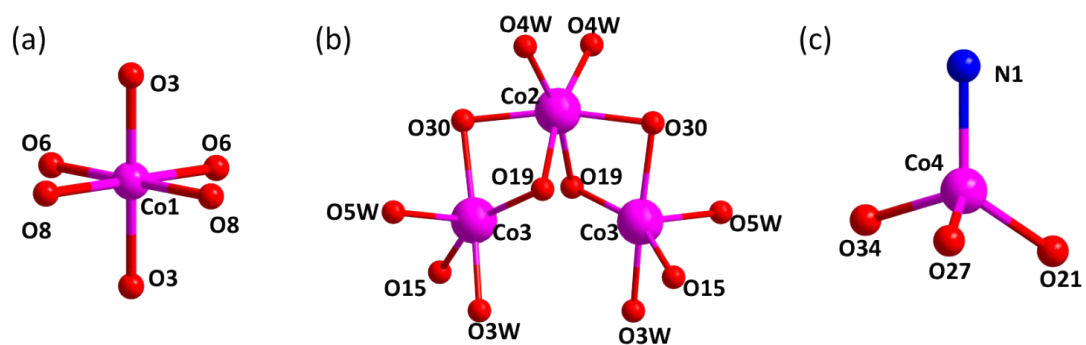

Fig. S4 The coordination mode of Co atoms of compound 1.

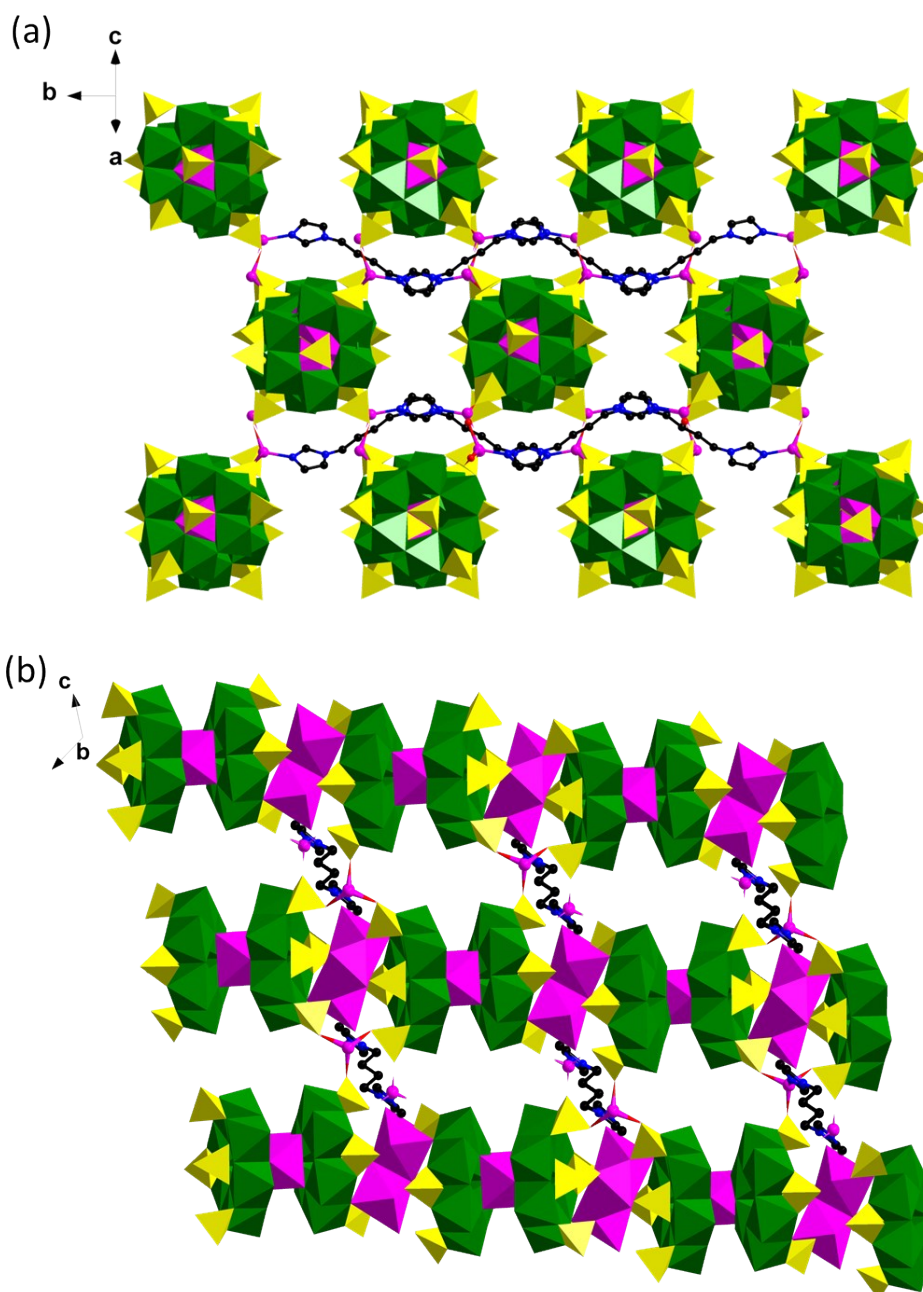

**Fig. S5** Different views of the 3D perspective of compound **1**.

**Topological structure of compound 1.** As shown in Fig. S6, each  $[H_{9.33}CoP_8Mo_{12}O_{62}]$  polyoxoanion and three  $Co^{2+}$  are regarded as a node, connected to each other to form an infinite inorganic chain. The adjacent 1D chains were linked by  $\{Co_2P_2\}$  units ( $Co_4$ ) to form a 2D layer. Furthermore, bbi act as a bridging ligands by providing two apical N donors to coordinate with  $Co_4$  atoms, staggered connection to form a 4,8-connected 3D framework.

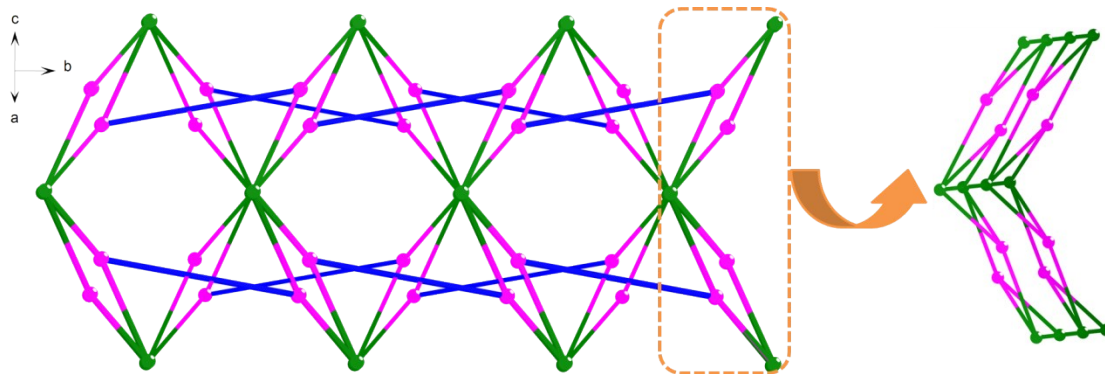

**Fig. S6** Topological view of the 3D framework in **1**. Color code: pink balls, Co4 bridges; green balls,  $\{[H_{9.33}CoP_8Mo_{12}O_{62}][Co_{2.33}(H_2O)_4]\}$  nodes; green rods, schematic view of the 1D chain; blue rods, bbi linkers.

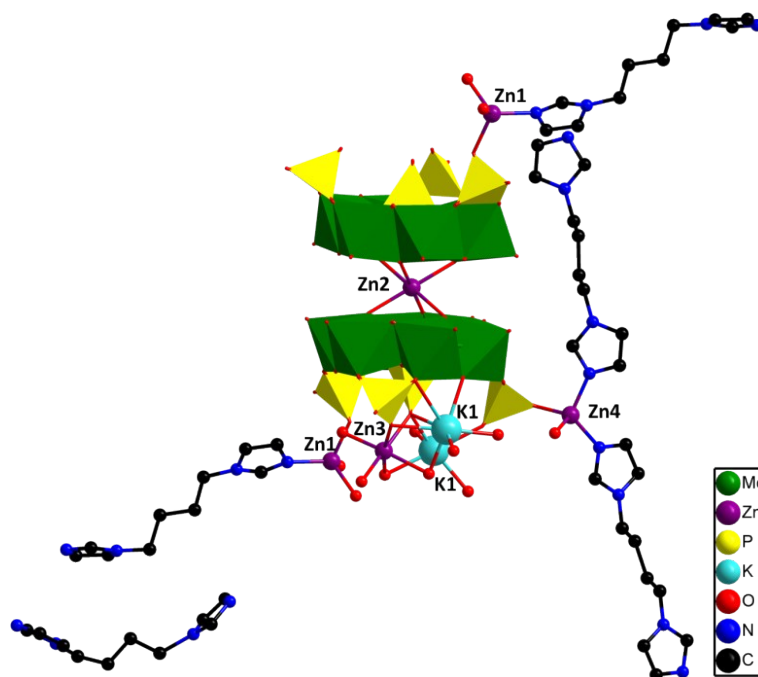

**Fig. S7** The basic unit of compound **2**.

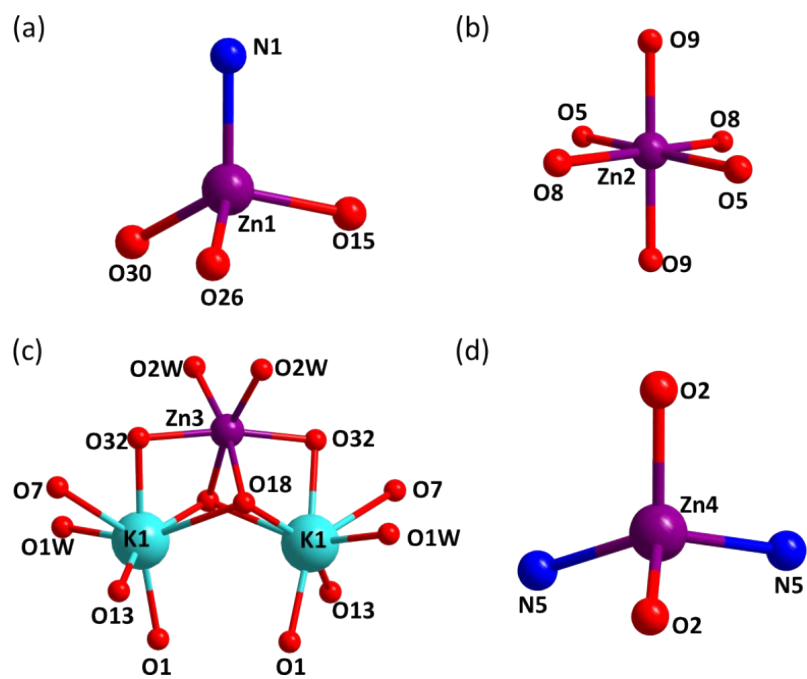

**Fig. S8** The coordination mode of Zn atoms of compound **2**.

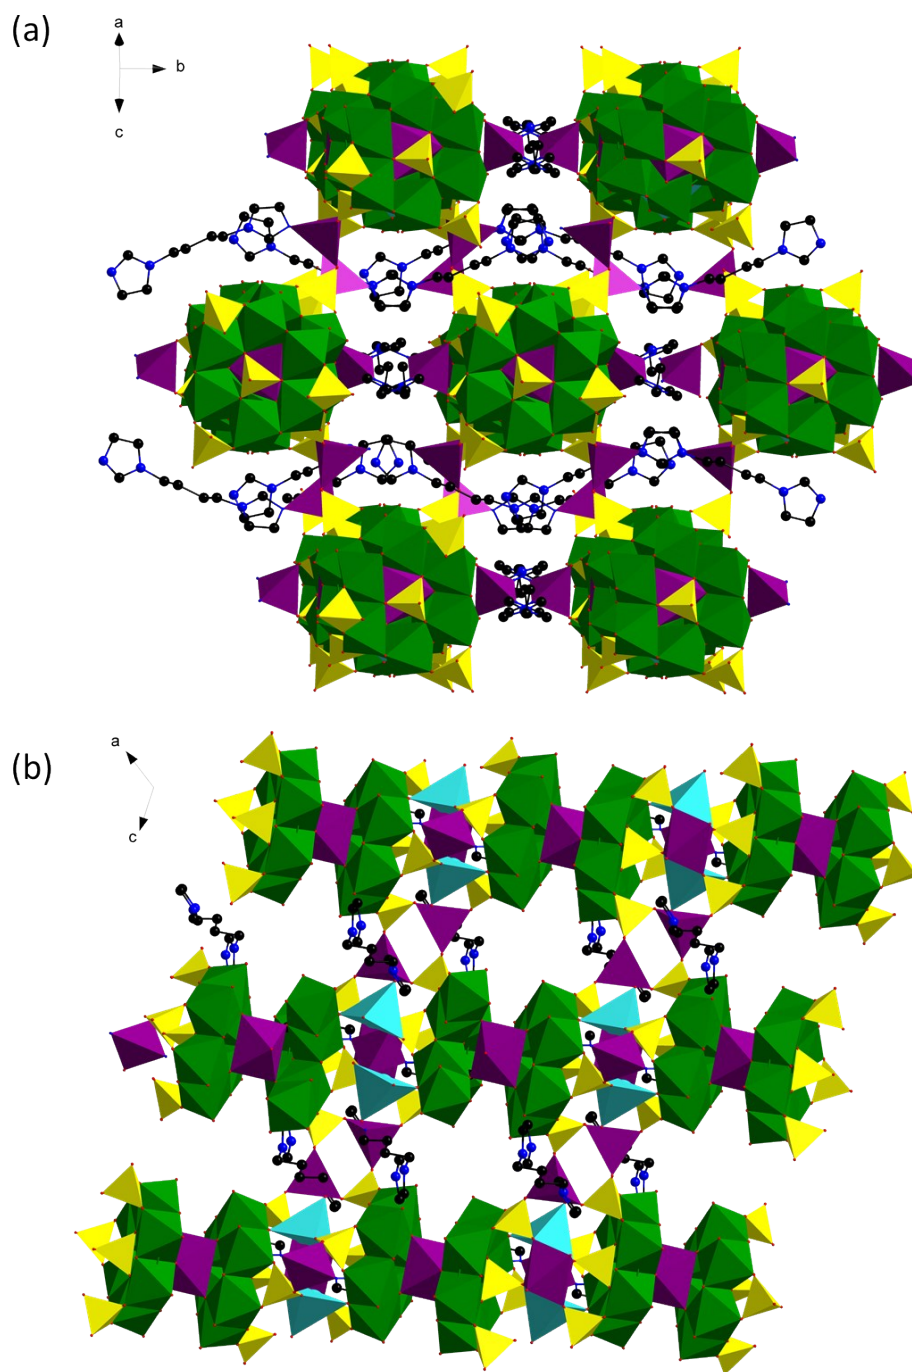

**Fig. S9** Different views of the 3D perspective of compound 2.



## IR spectra

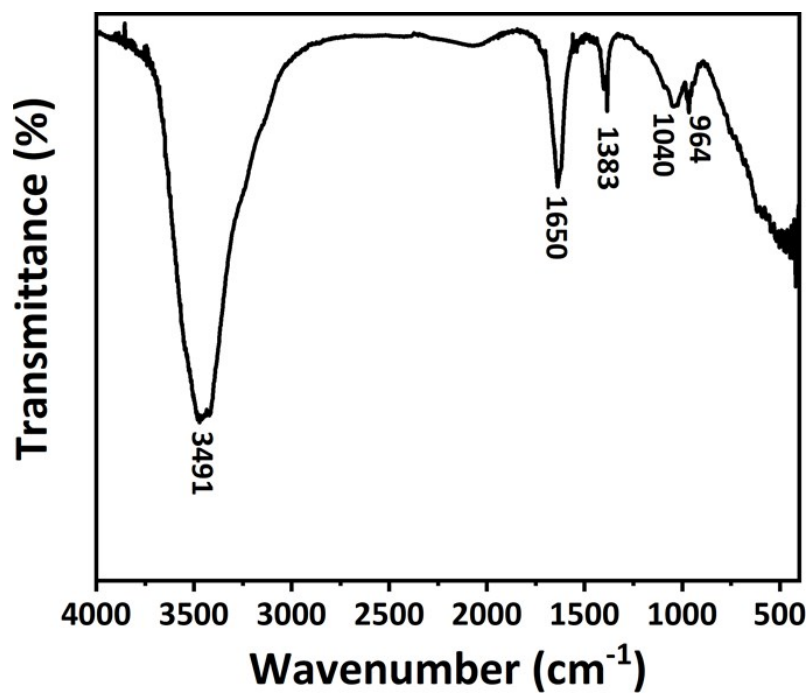

Fig. S10 IR spectra of compound 1.

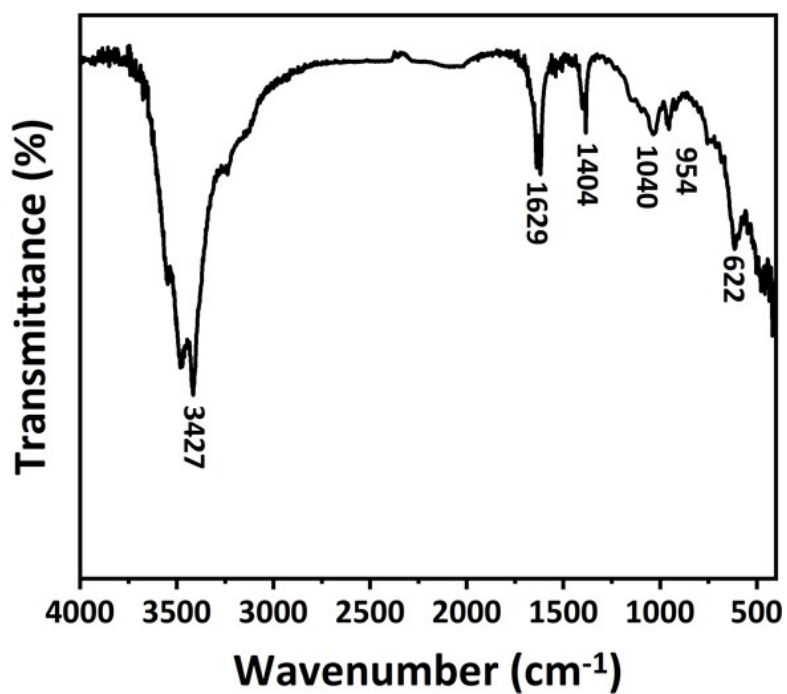

Fig. S11 IR spectra of compound 2.

## PXRD patterns

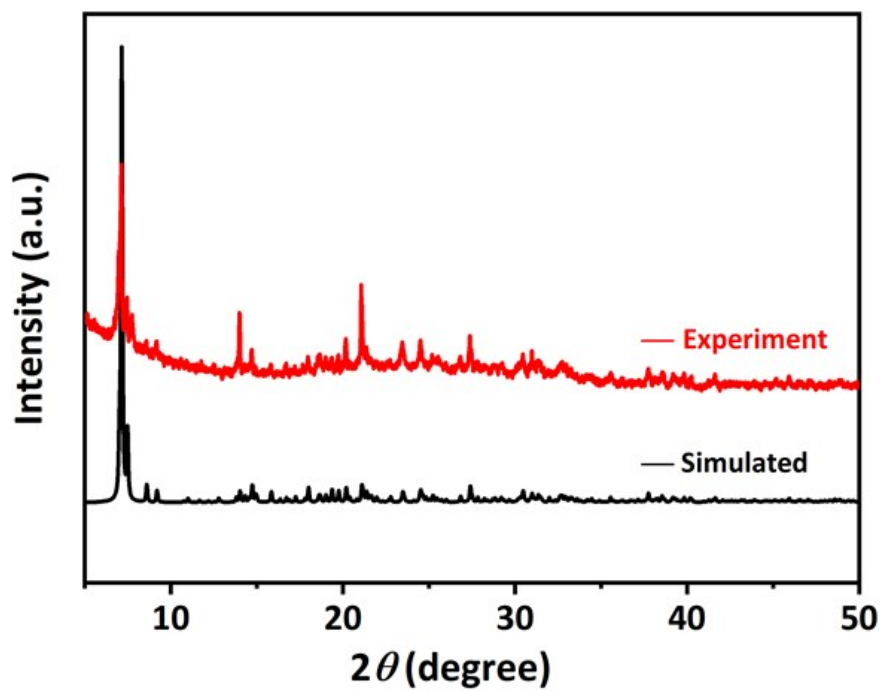

Fig. S12 PXRD patterns of compound 1.

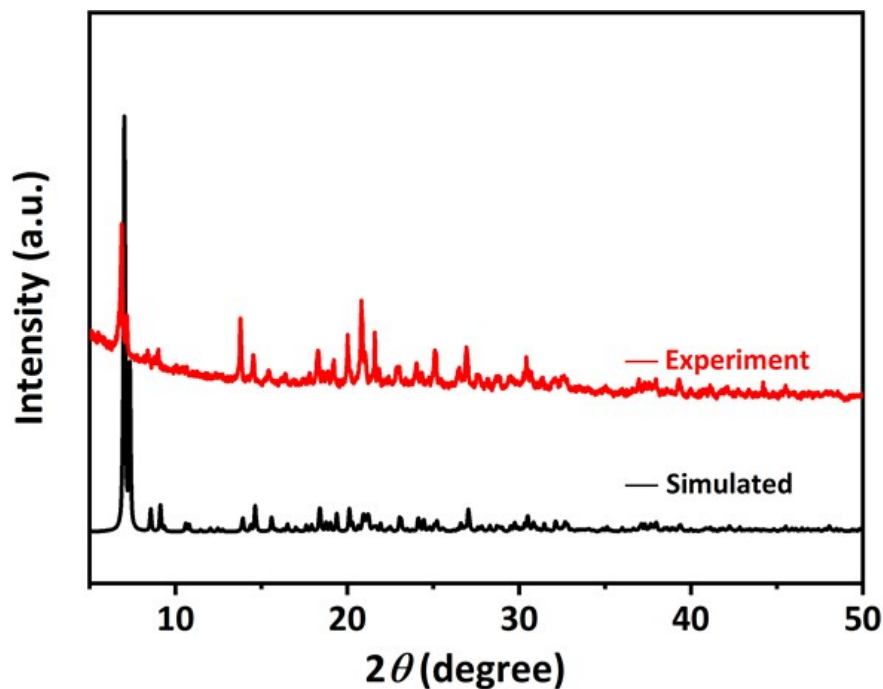

Fig. S13 PXRD patterns of compound 2.

TG

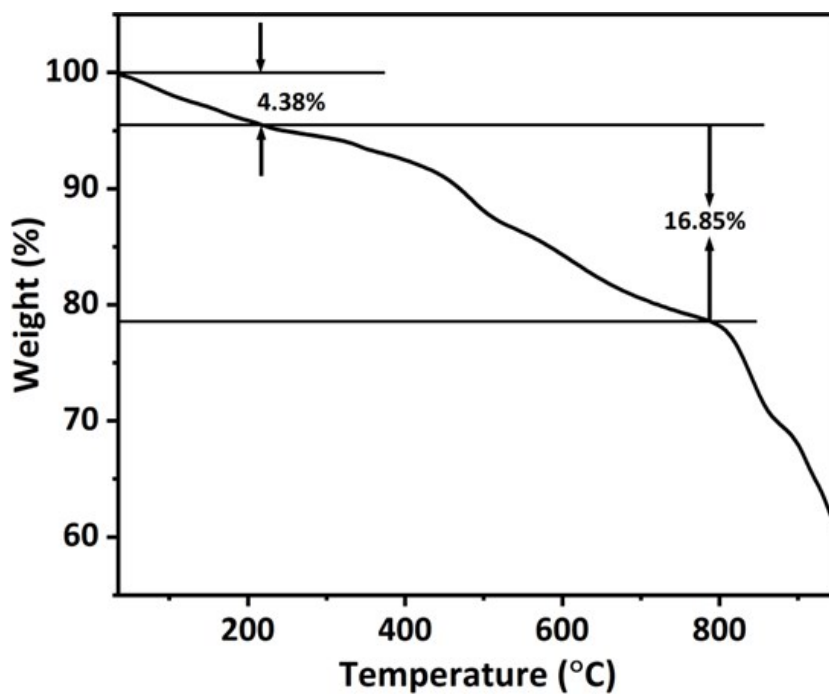

Fig. S14 TG curve of compound 1.

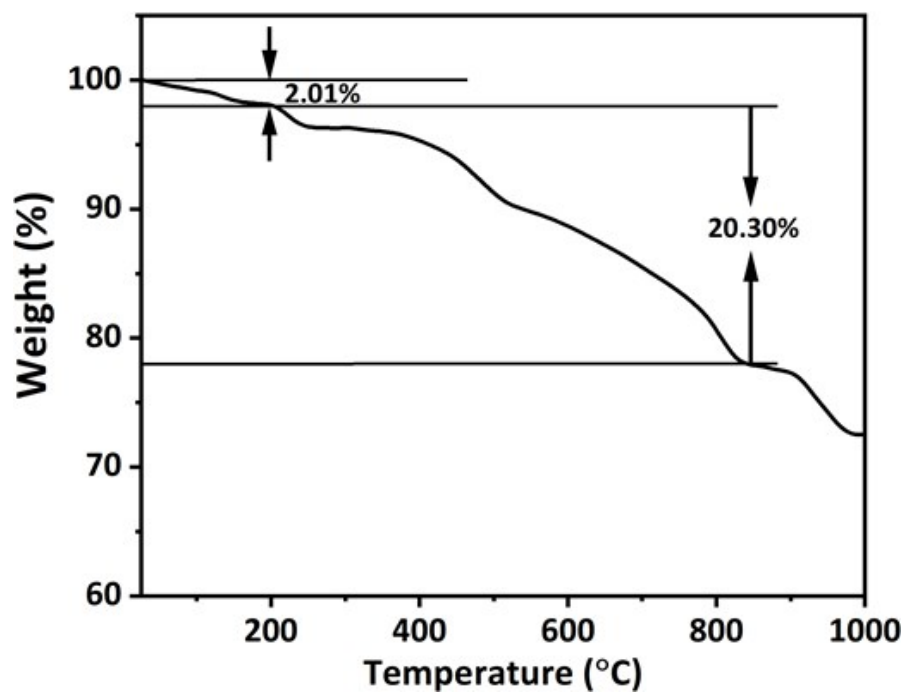

Fig. S15 TG curve of compound 2.

## Stability Test

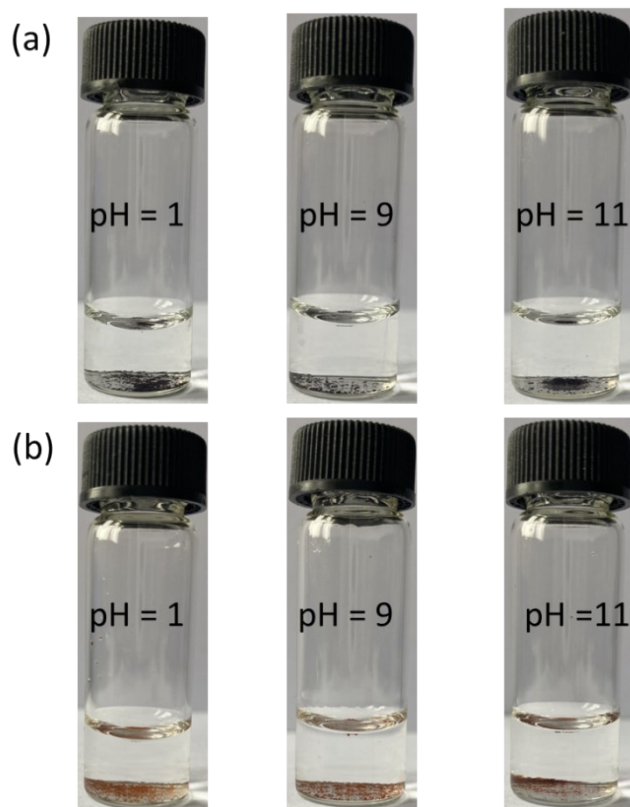

**Fig. S16** The Images of compounds **1** and **2** soaked for 24 hours at different pH conditions.

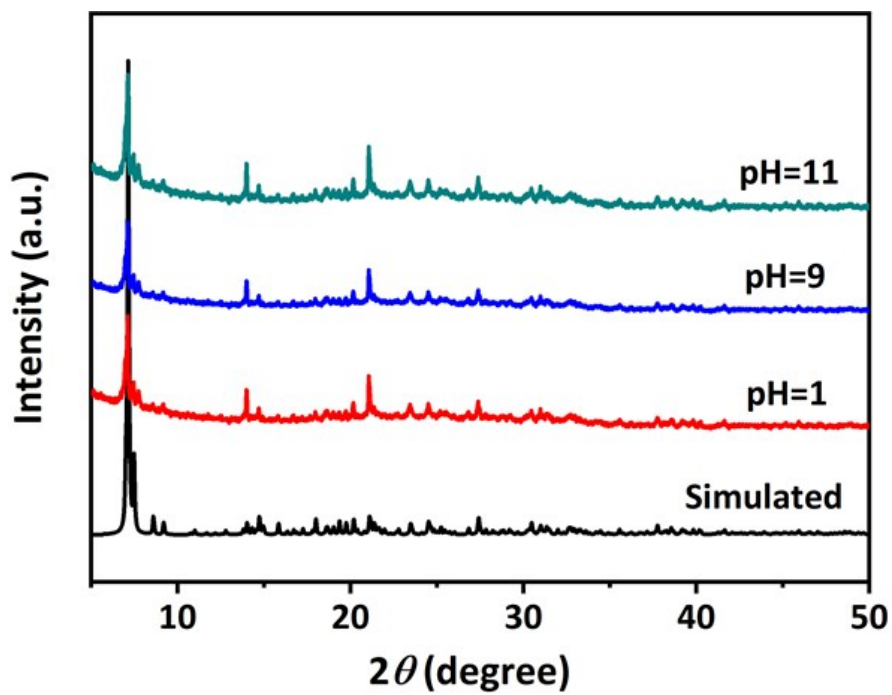

**Fig. S17** The PXRD patterns of compound **1** in different solutions compared with simulated curves.

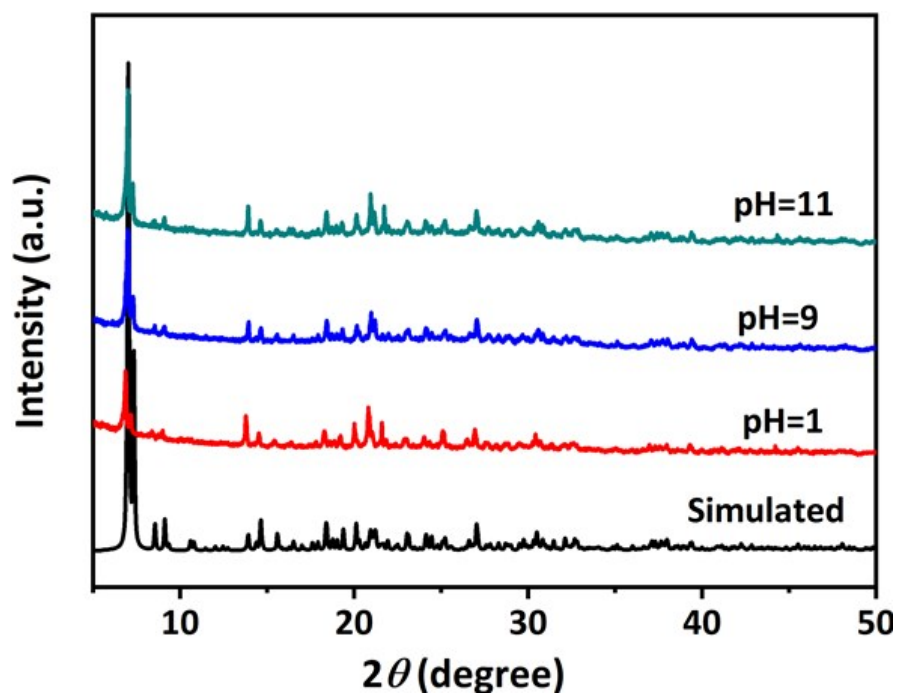

**Fig. S18** The PXRD patterns of compound **2** in different solutions compared with simulated curves.

## SEM and EDS

The as-prepared compounds **1** and **2** exhibited a morphology of block-shaped crystals and rhomboid-massive shaped crystals based on the SEM, respectively (Figure S19). The energy-dispersive spectrometry (EDS) data of the two compounds prove that C, N, O, P and transition metal elements are present (Figures S20 and S21).

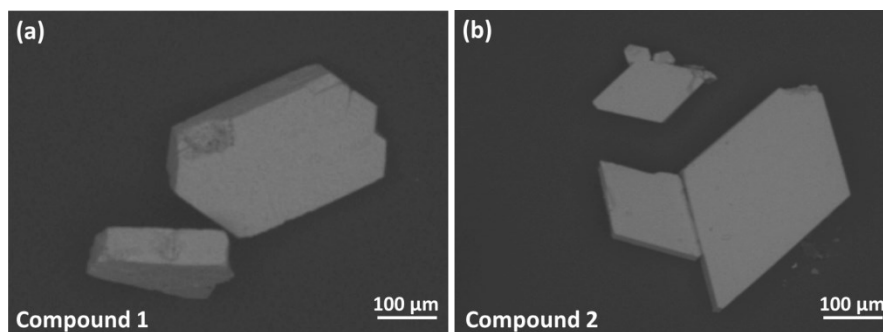

**Fig. S19** SEM images of compound **1** (a) and compound **2** (b).

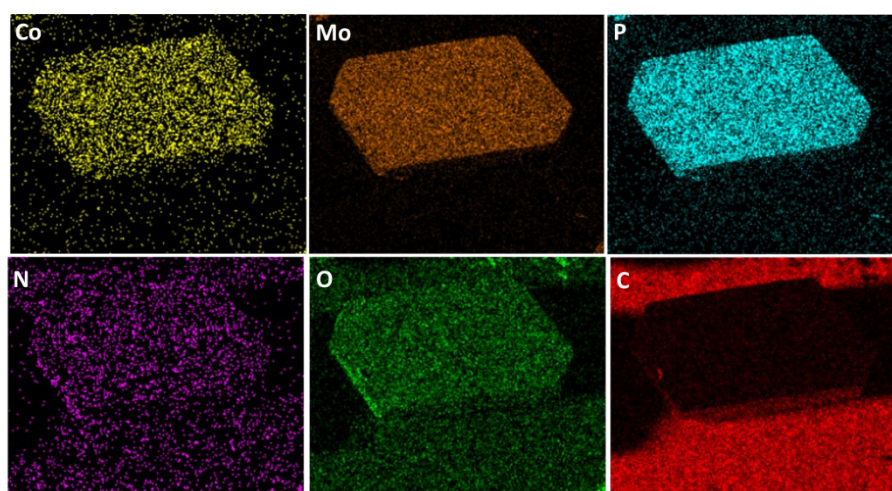

**Fig. S20** EDS mapping images of compound **1**.

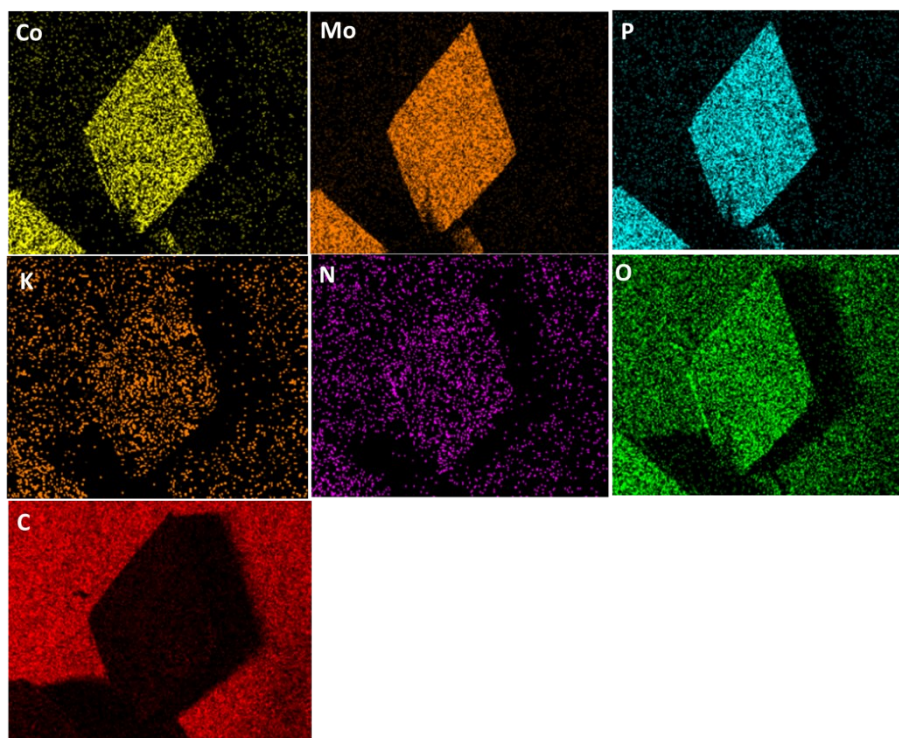

Fig. S21 EDS mapping images of compound 2.

## Photographs of the CO<sub>2</sub> reduction devices

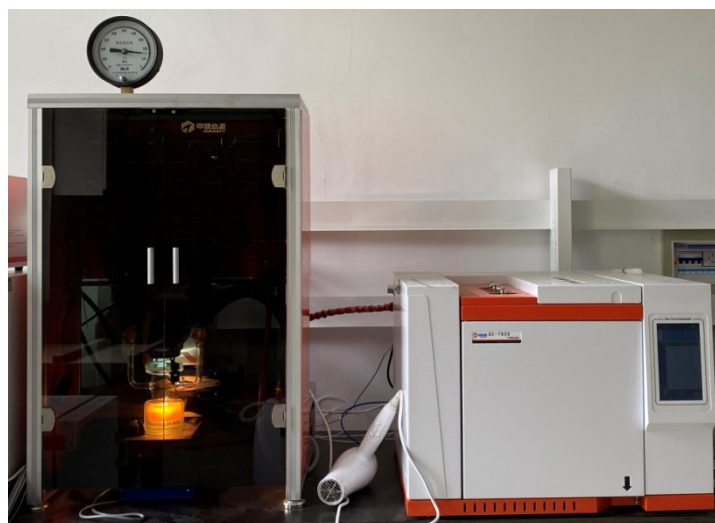

**Fig. S22** Photographs of the photocatalytic CO<sub>2</sub> reduction devices.



## GC profiles

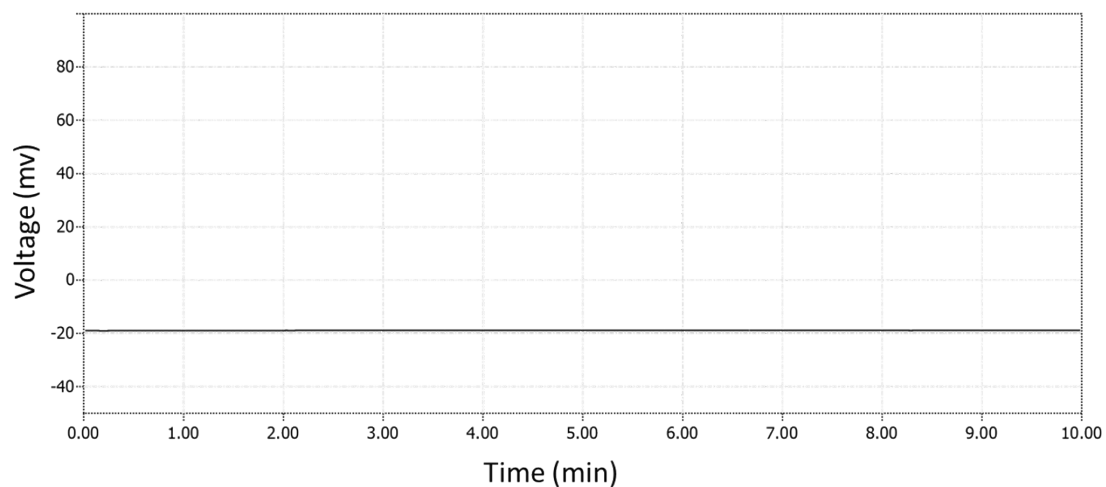

**Fig. S23** GC profiles of the gaseous reaction products with compound **1** as catalyst by using the TCD.

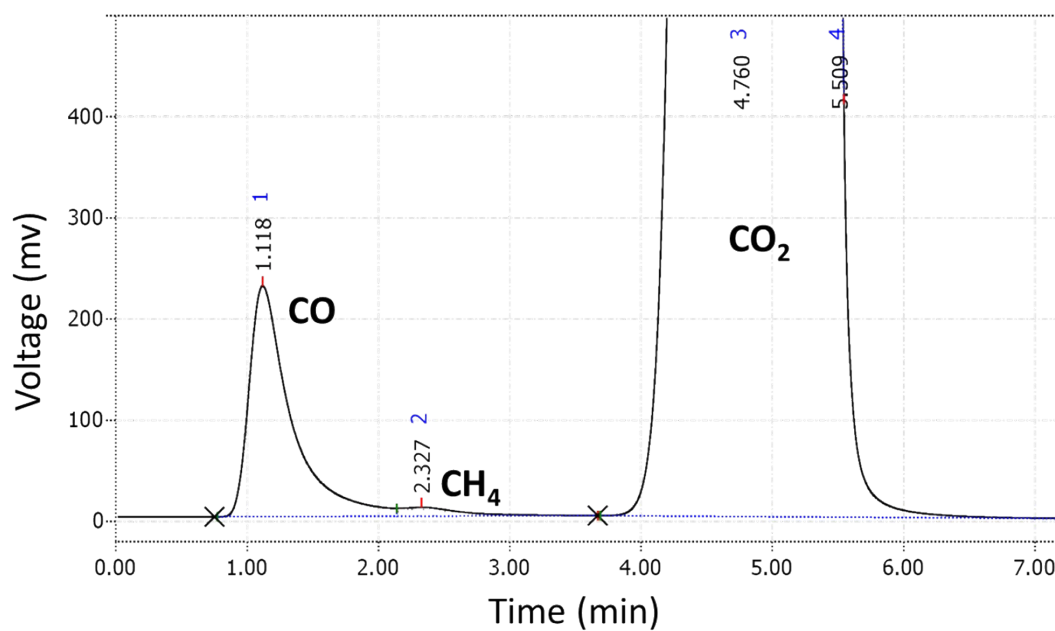

**Fig. S24** GC profiles of CO<sub>2</sub> reduction to CO with compound **1** as catalyst after reaction 8 h.

**Table S1.** Bond lengths (Å) of main atoms for compound **1**.

|              |          |               |           |
|--------------|----------|---------------|-----------|
| Mo(1)-O(18)  | 1.674(6) | Co(1)-O(3)#1  | 2.155(6)  |
| Mo(1)-O(14)  | 1.931(6) | Co(1)-O(6)    | 2.186(5)  |
| Mo(1)-O(3)   | 1.982(6) | Co(1)-O(6)#1  | 2.186(5)  |
| Mo(1)-O(7)   | 2.084(6) | Co(2)-O(4W)   | 2.066(7)  |
| Mo(1)-O(4)   | 2.102(6) | Co(2)-O(4W)#2 | 2.066(7)  |
| Mo(1)-O(12)  | 2.283(6) | Co(2)-O(30)   | 2.105(7)  |
| Mo(2)-O(20)  | 1.673(6) | Co(2)-O(30)#2 | 2.105(7)  |
| Mo(2)-O(10)  | 1.928(6) | Co(2)-O(19)#2 | 2.174(6)  |
| Mo(2)-O(8)   | 1.987(5) | Co(2)-O(19)   | 2.174(6)  |
| Mo(2)-O(17)  | 2.048(6) | Co(3)-O(3W)   | 2.004(17) |
| Mo(2)-O(13)  | 2.112(6) | Co(3)-O(19)#2 | 2.167(6)  |
| Mo(2)-O(9)   | 2.264(6) | Co(3)-O(30)   | 2.181(7)  |
| Mo(3)-O(32)  | 1.682(6) | Co(3)-O(5W)   | 2.247(11) |
| Mo(3)-O(14)  | 1.946(6) | Co(3)-O(15)   | 2.283(8)  |
| Mo(3)-O(3)   | 1.975(6) | Co(4)-O(21)   | 1.941(7)  |
| Mo(3)-O(11)  | 2.040(6) | Co(4)-O(34)   | 1.942(7)  |
| Mo(3)-O(5)   | 2.097(6) | Co(4)-O(27)   | 1.966(6)  |
| Mo(3)-O(25)  | 2.328(5) | Co(4)-N(1)    | 1.981(8)  |
| Mo(4)-O(29)  | 1.675(7) | P(1A)-O(31)   | 1.459(9)  |
| Mo(4)-O(10)  | 1.937(6) | P(1A)-O(24)   | 1.575(9)  |
| Mo(4)-O(8)   | 1.973(6) | P(1A)-O(1)    | 1.578(15) |
| Mo(4)-O(28)  | 2.037(6) | P(1A)-O(7)    | 1.652(9)  |
| Mo(4)-O(5)   | 2.089(6) | P(1B)-O(7)    | 1.454(8)  |
| Mo(4)-O(25)  | 2.375(6) | P(1B)-O(2)    | 1.501(9)  |
| Mo(5)-O(26)  | 1.687(7) | P(1B)-O(31)   | 1.571(9)  |
| Mo(5)-O(15)  | 1.945(6) | P(1B)-O(24)   | 1.641(10) |
| Mo(5)-O(6)   | 1.981(5) | P(2)-O(19)    | 1.516(6)  |
| Mo(5)-O(23)  | 2.046(6) | P(2)-O(25)    | 1.531(6)  |
| Mo(5)-O(13)  | 2.084(6) | P(2)-O(9)     | 1.546(6)  |
| Mo(5)-O(9)   | 2.281(6) | P(2)-O(12)    | 1.553(6)  |
| Mo(6)-O(33)  | 1.677(8) | P(3)-O(28)    | 1.532(7)  |
| Mo(6)-O(15)  | 1.951(7) | P(3)-O(21)#3  | 1.533(7)  |
| Mo(6)-O(6)   | 1.969(6) | P(3)-O(11)    | 1.537(7)  |
| Mo(6)-O(24)  | 2.081(7) | P(3)-O(27)    | 1.540(7)  |
| Mo(6)-O(4)   | 2.085(6) | P(4)-O(30)    | 1.526(7)  |
| Mo(6)-O(12)  | 2.264(6) | P(4)-O(34)#2  | 1.528(7)  |
| Co(1)-O(8)#1 | 2.112(6) | P(4)-O(17)    | 1.537(7)  |
| Co(1)-O(8)   | 2.112(6) | P(4)-O(23)    | 1.541(8)  |
| Co(1)-O(3)   | 2.155(6) |               |           |

**Table S2.** Bond angles (°) of main atoms for compound **1**.

|                   |          |                       |          |
|-------------------|----------|-----------------------|----------|
| O(18)-Mo(1)-O(14) | 105.1(3) | O(6)-Mo(5)-O(13)      | 86.3(2)  |
| O(18)-Mo(1)-O(3)  | 102.4(3) | O(23)-Mo(5)-O(13)     | 84.2(3)  |
| O(14)-Mo(1)-O(3)  | 95.8(3)  | O(26)-Mo(5)-O(9)      | 172.1(3) |
| O(18)-Mo(1)-O(7)  | 95.2(3)  | O(15)-Mo(5)-O(9)      | 81.5(3)  |
| O(14)-Mo(1)-O(7)  | 87.5(3)  | O(6)-Mo(5)-O(9)       | 79.9(2)  |
| O(3)-Mo(1)-O(7)   | 160.4(2) | O(23)-Mo(5)-O(9)      | 80.3(2)  |
| O(18)-Mo(1)-O(4)  | 98.5(3)  | O(13)-Mo(5)-O(9)      | 73.7(2)  |
| O(14)-Mo(1)-O(4)  | 155.2(2) | O(33)-Mo(6)-O(15)     | 105.4(4) |
| O(3)-Mo(1)-O(4)   | 86.4(2)  | O(33)-Mo(6)-O(6)      | 102.0(4) |
| O(7)-Mo(1)-O(4)   | 82.7(3)  | O(15)-Mo(6)-O(6)      | 95.4(3)  |
| O(18)-Mo(1)-O(12) | 170.8(3) | O(33)-Mo(6)-O(24)     | 95.8(4)  |
| O(14)-Mo(1)-O(12) | 83.1(2)  | O(15)-Mo(6)-O(24)     | 86.2(3)  |
| O(3)-Mo(1)-O(12)  | 80.5(2)  | O(6)-Mo(6)-O(24)      | 160.9(3) |
| O(7)-Mo(1)-O(12)  | 80.8(2)  | O(33)-Mo(6)-O(4)      | 98.0(3)  |
| O(4)-Mo(1)-O(12)  | 72.8(2)  | O(15)-Mo(6)-O(4)      | 155.7(3) |
| O(20)-Mo(2)-O(10) | 104.2(3) | O(6)-Mo(6)-O(4)       | 85.9(2)  |
| O(20)-Mo(2)-O(8)  | 102.9(3) | O(24)-Mo(6)-O(4)      | 84.9(3)  |
| O(10)-Mo(2)-O(8)  | 95.6(3)  | O(33)-Mo(6)-O(12)     | 170.2(3) |
| O(20)-Mo(2)-O(17) | 98.4(3)  | O(15)-Mo(6)-O(12)     | 82.6(3)  |
| O(10)-Mo(2)-O(17) | 84.8(3)  | O(6)-Mo(6)-O(12)      | 82.5(2)  |
| O(8)-Mo(2)-O(17)  | 158.0(2) | O(24)-Mo(6)-O(12)     | 78.9(3)  |
| O(20)-Mo(2)-O(13) | 94.7(3)  | O(4)-Mo(6)-O(12)      | 73.5(2)  |
| O(10)-Mo(2)-O(13) | 159.8(2) | O(8)#1-Co(1)-O(8)     | 180      |
| O(8)-Mo(2)-O(13)  | 86.9(2)  | O(8)#1-Co(1)-O(3)     | 84.7(2)  |
| O(17)-Mo(2)-O(13) | 85.6(3)  | O(8)-Co(1)-O(3)       | 95.3(2)  |
| O(20)-Mo(2)-O(9)  | 168.0(3) | O(8)#1-Co(1)-O(3)#1   | 95.3(2)  |
| O(10)-Mo(2)-O(9)  | 87.1(2)  | O(8)-Co(1)-O(3)#1     | 84.7(2)  |
| O(8)-Mo(2)-O(9)   | 79.4(2)  | O(3)-Co(1)-O(3)#1     | 180      |
| O(17)-Mo(2)-O(9)  | 78.6(2)  | O(8)#1-Co(1)-O(6)     | 84.0(2)  |
| O(13)-Mo(2)-O(9)  | 73.6(2)  | O(8)-Co(1)-O(6)       | 96.0(2)  |
| O(32)-Mo(3)-O(14) | 104.4(3) | O(3)-Co(1)-O(6)       | 96.0(2)  |
| O(32)-Mo(3)-O(3)  | 102.3(3) | O(3)#1-Co(1)-O(6)     | 84.0(2)  |
| O(14)-Mo(3)-O(3)  | 95.5(2)  | O(8)#1-Co(1)-O(6)#1   | 96.0(2)  |
| O(32)-Mo(3)-O(11) | 97.1(3)  | O(8)-Co(1)-O(6)#1     | 84.0(2)  |
| O(14)-Mo(3)-O(11) | 88.8(3)  | O(3)-Co(1)-O(6)#1     | 84.0(2)  |
| O(3)-Mo(3)-O(11)  | 158.3(3) | O(3)#1-Co(1)-O(6)#1   | 96.0(2)  |
| O(32)-Mo(3)-O(5)  | 96.8(3)  | O(6)-Co(1)-O(6)#1     | 180      |
| O(14)-Mo(3)-O(5)  | 158.1(2) | O(4W)-Co(2)-O(4W)#2   | 95.1(4)  |
| O(3)-Mo(3)-O(5)   | 85.2(2)  | O(4W)-Co(2)-O(30)     | 84.0(3)  |
| O(11)-Mo(3)-O(5)  | 83.0(3)  | O(4W)#2-Co(2)-O(30)   | 104.5(3) |
| O(32)-Mo(3)-O(25) | 170.2(3) | O(4W)-Co(2)-O(30)#2   | 104.5(3) |
| O(14)-Mo(3)-O(25) | 83.7(2)  | O(4W)#2-Co(2)-O(30)#2 | 84.0(3)  |

|                   |          |                       |          |
|-------------------|----------|-----------------------|----------|
| O(3)-Mo(3)-O(25)  | 82.0(2)  | O(30)-Co(2)-O(30)#2   | 167.5(4) |
| O(11)-Mo(3)-O(25) | 77.3(2)  | O(4W)-Co(2)-O(19)#2   | 92.5(2)  |
| O(5)-Mo(3)-O(25)  | 74.7(2)  | O(4W)#2-Co(2)-O(19)#2 | 167.6(3) |
| O(29)-Mo(4)-O(10) | 104.3(3) | O(30)-Co(2)-O(19)#2   | 86.0(2)  |
| O(29)-Mo(4)-O(8)  | 102.3(3) | O(30)#2-Co(2)-O(19)#2 | 84.6(2)  |
| O(10)-Mo(4)-O(8)  | 95.7(3)  | O(4W)-Co(2)-O(19)     | 167.6(3) |
| O(29)-Mo(4)-O(28) | 97.4(3)  | O(4W)#2-Co(2)-O(19)   | 92.5(2)  |
| O(10)-Mo(4)-O(28) | 86.6(3)  | O(30)-Co(2)-O(19)     | 84.6(2)  |
| O(8)-Mo(4)-O(28)  | 158.8(2) | O(30)#2-Co(2)-O(19)   | 86.0(2)  |
| O(29)-Mo(4)-O(5)  | 98.0(3)  | O(19)#2-Co(2)-O(19)   | 81.8(3)  |
| O(10)-Mo(4)-O(5)  | 156.6(2) | O(3W)-Co(3)-O(19)#2   | 94.1(5)  |
| O(8)-Mo(4)-O(5)   | 86.3(2)  | O(3W)-Co(3)-O(30)     | 174.1(5) |
| O(28)-Mo(4)-O(5)  | 83.4(2)  | O(19)#2-Co(3)-O(30)   | 84.3(2)  |
| O(29)-Mo(4)-O(25) | 171.2(3) | O(3W)-Co(3)-O(5W)     | 86.8(5)  |
| O(10)-Mo(4)-O(25) | 83.4(2)  | O(19)#2-Co(3)-O(5W)   | 94.0(3)  |
| O(8)-Mo(4)-O(25)  | 80.8(2)  | O(30)-Co(3)-O(5W)     | 87.7(3)  |
| O(28)-Mo(4)-O(25) | 78.6(2)  | O(3W)-Co(3)-O(15)     | 77.3(5)  |
| O(5)-Mo(4)-O(25)  | 73.8(2)  | O(19)#2-Co(3)-O(15)   | 155.5(2) |
| O(26)-Mo(5)-O(15) | 105.6(3) | O(30)-Co(3)-O(15)     | 106.3(3) |
| O(26)-Mo(5)-O(6)  | 102.6(3) | O(5W)-Co(3)-O(15)     | 108.1(3) |
| O(15)-Mo(5)-O(6)  | 95.3(3)  | O(21)-Co(4)-O(34)     | 102.1(4) |
| O(26)-Mo(5)-O(23) | 96.5(3)  | O(21)-Co(4)-O(27)     | 108.6(3) |
| O(15)-Mo(5)-O(23) | 85.9(3)  | O(34)-Co(4)-O(27)     | 107.4(3) |
| O(6)-Mo(5)-O(23)  | 159.8(3) | O(21)-Co(4)-N(1)      | 121.3(3) |
| O(26)-Mo(5)-O(13) | 98.8(3)  | O(34)-Co(4)-N(1)      | 105.3(4) |
| O(15)-Mo(5)-O(13) | 154.5(3) | O(27)-Co(4)-N(1)      | 111.0(3) |

**Table S3.** Bond lengths (Å) of main atoms for compound **2**.

|             |          |               |          |
|-------------|----------|---------------|----------|
| Mo(1)-O(28) | 1.677(4) | Zn(1)-O(26)#1 | 1.930(4) |
| Mo(1)-O(20) | 1.936(4) | Zn(1)-O(30)#2 | 1.954(5) |
| Mo(1)-O(8)  | 1.975(4) | Zn(1)-O(15)   | 1.974(5) |
| Mo(1)-O(25) | 2.068(5) | Zn(1)-N(1)    | 2.015(6) |
| Mo(1)-O(6)  | 2.084(4) | Zn(2)-O(8)    | 2.144(4) |
| Mo(1)-O(29) | 2.325(4) | Zn(2)-O(8)#3  | 2.145(4) |
| Mo(2)-O(24) | 1.696(4) | Zn(2)-O(5)#3  | 2.190(5) |
| Mo(2)-O(20) | 1.940(5) | Zn(2)-O(5)    | 2.190(5) |
| Mo(2)-O(8)  | 1.980(4) | Zn(2)-O(9)    | 2.218(5) |
| Mo(2)-O(11) | 2.052(5) | Zn(2)-O(9)#3  | 2.218(5) |
| Mo(2)-O(21) | 2.121(4) | Zn(3)-O(32)   | 2.060(5) |
| Mo(2)-O(23) | 2.260(4) | Zn(3)-O(32)#1 | 2.060(5) |
| Mo(3)-O(27) | 1.674(4) | Zn(3)-O(2W)#1 | 2.089(5) |
| Mo(3)-O(10) | 1.940(4) | Zn(3)-O(2W)   | 2.089(5) |
| Mo(3)-O(5)  | 1.979(4) | Zn(3)-O(18)#1 | 2.207(4) |
| Mo(3)-O(14) | 2.060(4) | Zn(3)-O(18)   | 2.207(4) |
| Mo(3)-O(12) | 2.092(5) | Zn(4)-O(2)    | 1.943(6) |
| Mo(3)-O(4)  | 2.305(4) | Zn(4)-O(2)#1  | 1.944(6) |
| Mo(4)-O(19) | 1.688(5) | Zn(4)-N(5)#1  | 1.955(9) |
| Mo(4)-O(10) | 1.942(4) | Zn(4)-N(5)    | 1.955(9) |
| Mo(4)-O(5)  | 1.974(4) | P(1)-O(30)    | 1.532(5) |
| Mo(4)-O(22) | 2.038(5) | P(1)-O(25)    | 1.539(5) |
| Mo(4)-O(6)  | 2.097(4) | P(1)-O(22)    | 1.539(4) |
| Mo(4)-O(29) | 2.315(5) | P(1)-O(15)    | 1.542(4) |
| Mo(5)-O(3)  | 1.691(5) | P(2)-O(18)    | 1.504(4) |
| Mo(5)-O(13) | 1.956(4) | P(2)-O(29)    | 1.547(4) |
| Mo(5)-O(9)  | 1.977(4) | P(2)-O(23)    | 1.557(4) |
| Mo(5)-O(16) | 2.103(5) | P(2)-O(4)     | 1.555(4) |
| Mo(5)-O(12) | 2.110(5) | P(3)-O(2)     | 1.516(5) |
| Mo(5)-O(4)  | 2.252(4) | P(3)-O(14)    | 1.522(5) |
| Mo(6)-O(17) | 1.693(5) | P(3)-O(16)    | 1.549(5) |
| Mo(6)-O(13) | 1.945(5) | P(3)-O(1)     | 1.580(5) |
| Mo(6)-O(9)  | 1.979(4) | P(4)-O(32)    | 1.491(5) |
| Mo(6)-O(7)  | 2.056(4) | P(4)-O(26)    | 1.511(4) |
| Mo(6)-O(21) | 2.100(4) | P(4)-O(7)     | 1.545(5) |
| Mo(6)-O(23) | 2.261(4) | P(4)-O(11)    | 1.551(4) |

**Table S4.** Bond angles (°) of main atoms for compound **2**.

|                   |            |                       |            |
|-------------------|------------|-----------------------|------------|
| O(28)-Mo(1)-O(20) | 105.1(2)   | O(3)-Mo(5)-O(12)      | 96.2(2)    |
| O(28)-Mo(1)-O(8)  | 102.4(2)   | O(13)-Mo(5)-O(12)     | 157.72(17) |
| O(20)-Mo(1)-O(8)  | 95.52(18)  | O(9)-Mo(5)-O(12)      | 86.03(17)  |
| O(28)-Mo(1)-O(25) | 95.4(2)    | O(16)-Mo(5)-O(12)     | 86.14(17)  |
| O(20)-Mo(1)-O(25) | 86.98(18)  | O(3)-Mo(5)-O(4)       | 167.7(2)   |
| O(8)-Mo(1)-O(25)  | 160.64(16) | O(13)-Mo(5)-O(4)      | 84.27(18)  |
| O(28)-Mo(1)-O(6)  | 96.3(2)    | O(9)-Mo(5)-O(4)       | 83.01(18)  |
| O(20)-Mo(1)-O(6)  | 157.86(17) | O(16)-Mo(5)-O(4)      | 77.58(17)  |
| O(8)-Mo(1)-O(6)   | 84.91(17)  | O(12)-Mo(5)-O(4)      | 73.83(16)  |
| O(25)-Mo(1)-O(6)  | 85.66(17)  | O(17)-Mo(6)-O(13)     | 106.3(2)   |
| O(28)-Mo(1)-O(29) | 169.63(18) | O(17)-Mo(6)-O(9)      | 102.5(2)   |
| O(20)-Mo(1)-O(29) | 83.58(16)  | O(13)-Mo(6)-O(9)      | 95.73(17)  |
| O(8)-Mo(1)-O(29)  | 82.01(18)  | O(17)-Mo(6)-O(7)      | 96.1(2)    |
| O(25)-Mo(1)-O(29) | 79.20(17)  | O(13)-Mo(6)-O(7)      | 85.14(18)  |
| O(6)-Mo(1)-O(29)  | 74.54(16)  | O(9)-Mo(6)-O(7)       | 160.27(16) |
| O(24)-Mo(2)-O(20) | 104.8(2)   | O(17)-Mo(6)-O(21)     | 98.1(2)    |
| O(24)-Mo(2)-O(8)  | 102.49(19) | O(13)-Mo(6)-O(21)     | 154.50(17) |
| O(20)-Mo(2)-O(8)  | 95.21(18)  | O(9)-Mo(6)-O(21)      | 85.95(17)  |
| O(24)-Mo(2)-O(11) | 96.1(2)    | O(7)-Mo(6)-O(21)      | 85.01(17)  |
| O(20)-Mo(2)-O(11) | 86.82(19)  | O(17)-Mo(6)-O(23)     | 169.90(19) |
| O(8)-Mo(2)-O(11)  | 160.06(17) | O(13)-Mo(6)-O(23)     | 82.98(18)  |
| O(24)-Mo(2)-O(21) | 97.0(2)    | O(9)-Mo(6)-O(23)      | 80.19(17)  |
| O(20)-Mo(2)-O(21) | 157.08(16) | O(7)-Mo(6)-O(23)      | 80.35(17)  |
| O(8)-Mo(2)-O(21)  | 86.77(17)  | O(21)-Mo(6)-O(23)     | 72.21(17)  |
| O(11)-Mo(2)-O(21) | 83.88(18)  | O(26)#1-Zn(1)-O(30)#2 | 99.1(2)    |
| O(24)-Mo(2)-O(23) | 168.61(18) | O(26)#1-Zn(1)-O(15)   | 108.19(19) |
| O(20)-Mo(2)-O(23) | 85.96(18)  | O(30)#2-Zn(1)-O(15)   | 111.0(2)   |
| O(8)-Mo(2)-O(23)  | 79.96(16)  | O(26)#1-Zn(1)-N(1)    | 111.8(2)   |
| O(11)-Mo(2)-O(23) | 80.41(16)  | O(30)#2-Zn(1)-N(1)    | 121.2(2)   |
| O(21)-Mo(2)-O(23) | 71.87(17)  | O(15)-Zn(1)-N(1)      | 105.0(2)   |
| O(27)-Mo(3)-O(10) | 105.7(2)   | O(8)-Zn(2)-O(8)#3     | 180        |
| O(27)-Mo(3)-O(5)  | 101.9(2)   | O(8)-Zn(2)-O(5)#3     | 84.68(16)  |
| O(10)-Mo(3)-O(5)  | 95.57(19)  | O(8)#3-Zn(2)-O(5)#3   | 95.32(16)  |
| O(27)-Mo(3)-O(14) | 96.2(2)    | O(8)-Zn(2)-O(5)       | 95.32(16)  |
| O(10)-Mo(3)-O(14) | 85.7(2)    | O(8)#3-Zn(2)-O(5)     | 84.68(16)  |
| O(5)-Mo(3)-O(14)  | 160.73(17) | O(5)#3-Zn(2)-O(5)     | 180.00(8)  |
| O(27)-Mo(3)-O(12) | 97.9(2)    | O(8)-Zn(2)-O(9)       | 98.48(15)  |
| O(10)-Mo(3)-O(12) | 155.24(17) | O(8)#3-Zn(2)-O(9)     | 81.53(15)  |
| O(5)-Mo(3)-O(12)  | 86.88(19)  | O(5)#3-Zn(2)-O(9)     | 85.15(17)  |
| O(14)-Mo(3)-O(12) | 84.2(2)    | O(5)-Zn(2)-O(9)       | 94.86(17)  |
| O(27)-Mo(3)-O(4)  | 170.72(19) | O(8)-Zn(2)-O(9)#3     | 81.53(15)  |
| O(10)-Mo(3)-O(4)  | 83.12(17)  | O(8)#3-Zn(2)-O(9)#3   | 98.47(15)  |

|                   |            |                       |            |
|-------------------|------------|-----------------------|------------|
| O(5)-Mo(3)-O(4)   | 79.78(16)  | O(5)#3-Zn(2)-O(9)#3   | 94.85(17)  |
| O(14)-Mo(3)-O(4)  | 81.29(17)  | O(5)-Zn(2)-O(9)#3     | 85.14(17)  |
| O(12)-Mo(3)-O(4)  | 73.05(16)  | O(9)-Zn(2)-O(9)#3     | 180        |
| O(19)-Mo(4)-O(10) | 104.5(2)   | O(32)-Zn(3)-O(32)#1   | 169.9(3)   |
| O(19)-Mo(4)-O(5)  | 101.1(2)   | O(32)-Zn(3)-O(2W)#1   | 82.3(2)    |
| O(10)-Mo(4)-O(5)  | 95.68(19)  | O(32)#1-Zn(3)-O(2W)#1 | 104.6(2)   |
| O(19)-Mo(4)-O(22) | 98.36(19)  | O(32)-Zn(3)-O(2W)     | 104.6(2)   |
| O(10)-Mo(4)-O(22) | 86.5(2)    | O(32)#1-Zn(3)-O(2W)   | 82.3(2)    |
| O(5)-Mo(4)-O(22)  | 159.20(17) | O(2W)#1-Zn(3)-O(2W)   | 96.0(3)    |
| O(19)-Mo(4)-O(6)  | 96.3(2)    | O(32)-Zn(3)-O(18)#1   | 85.62(19)  |
| O(10)-Mo(4)-O(6)  | 158.37(17) | O(32)#1-Zn(3)-O(18)#1 | 87.09(19)  |
| O(5)-Mo(4)-O(6)   | 85.93(19)  | O(2W)#1-Zn(3)-O(18)#1 | 88.93(18)  |
| O(22)-Mo(4)-O(6)  | 84.64(19)  | O(2W)-Zn(3)-O(18)#1   | 169.16(17) |
| O(19)-Mo(4)-O(29) | 170.04(18) | O(32)-Zn(3)-O(18)     | 87.08(19)  |
| O(10)-Mo(4)-O(29) | 84.31(17)  | O(32)#1-Zn(3)-O(18)   | 85.62(19)  |
| O(5)-Mo(4)-O(29)  | 82.28(16)  | O(2W)#1-Zn(3)-O(18)   | 169.16(17) |
| O(22)-Mo(4)-O(29) | 77.35(16)  | O(2W)-Zn(3)-O(18)     | 88.93(18)  |
| O(6)-Mo(4)-O(29)  | 74.51(15)  | O(18)#1-Zn(3)-O(18)   | 87.9(2)    |
| O(3)-Mo(5)-O(13)  | 104.9(2)   | O(2)-Zn(4)-O(2)#1     | 112.0(3)   |
| O(3)-Mo(5)-O(9)   | 103.9(2)   | O(2)-Zn(4)-N(5)#1     | 112.0(3)   |
| O(13)-Mo(5)-O(9)  | 95.47(18)  | O(2)#1-Zn(4)-N(5)#1   | 102.1(3)   |
| O(3)-Mo(5)-O(16)  | 94.7(2)    | O(2)-Zn(4)-N(5)       | 102.1(3)   |
| O(13)-Mo(5)-O(16) | 85.20(18)  | O(2)#1-Zn(4)-N(5)     | 112.0(3)   |
| O(9)-Mo(5)-O(16)  | 160.42(17) | N(5)#1-Zn(4)-N(5)     | 116.9(5)   |

**Table S5.** The BVS calculation<sup>3</sup> result of Mo and Co atoms in **1**.

| Code | Bond Valence | Code | Bond Valence |
|------|--------------|------|--------------|
| Mo1  | 5.20         | Mo6  | 5.22         |
| Mo2  | 5.27         | Co1  | 1.74         |
| Mo3  | 5.19         | Co2  | 1.93         |
| Mo4  | 5.23         | Co3  | 1.51         |
| Mo5  | 5.20         | Co4  | 2.18         |

**Table S6.** The BVS calculation<sup>3</sup> result of Mo and Zn atoms in **2**.

| Code | Bond Valence | Code | Bond Valence |
|------|--------------|------|--------------|
| Mo1  | 5.21         | Mo6  | 5.15         |
| Mo2  | 5.13         | Zn1  | 1.97         |
| Mo3  | 5.22         | Zn2  | 1.64         |
| Mo4  | 5.18         | Zn3  | 1.98         |
| Mo5  | 5.06         | Zn4  | 2.06         |

**Table S7.** The ICP result of the compounds **1** and **2**.

| Compound <b>1</b> | Co<br>(mmol/L)         | Co<br>(found (%)) | Co<br>(Calc. (%)) |
|-------------------|------------------------|-------------------|-------------------|
| Content           | $2.672 \times 10^{-4}$ | 9.20              | 9.40              |
| Compound <b>2</b> | Zn<br>(mmol/L)         | Zn<br>(found (%)) | Zn<br>(Calc. (%)) |
| Content           | $2.380 \times 10^{-4}$ | 8.63              | 8.56              |

The ICP results show that the experimental values are in good agreement with the theoretical values of single crystal X - ray diffraction.



**Table S8.** Comparison of reported  $\{P_4Mo_6\}$ -based materials of  $CO_2$  photoreduction.

| Photocatalyst                                                                                              | Main product    | Side product          | Efficiency of main product ( $\mu\text{mol g}^{-1}$ ) | Time      | Ref              |
|------------------------------------------------------------------------------------------------------------|-----------------|-----------------------|-------------------------------------------------------|-----------|------------------|
| $(C_2H_5OH)(C_3H_5N_2)_6[Co_3(H_6P_4Mo_6O_{31})_2] \cdot H_2O$                                             | CO              | None                  | 5789                                                  | 8h        | 4                |
| <b><math>(H_2bbi)_2\{[Co_2(bbi)][Co_{2.33}(H_2O)_4][H_{9.33}Co_8P_8Mo_{12}O_{62}]\} \cdot 4H_2O</math></b> | <b>CO</b>       | <b>CH<sub>4</sub></b> | <b>3261</b>                                           | <b>8h</b> | <b>This work</b> |
| $Na_6[Co(H_2O)_2(H_2tib)]_2\{Co[Mo_6O_{15}(HPO_4)_4]_2\} \cdot 5H_2O$                                      | CO              | CH <sub>4</sub>       | 10.76                                                 | 10h       | 5                |
| $Na_3[Co(H_2O)_3][Co_2(bib)](H_2bib)_{2.5}\{HCo[Mo_6O_{14}(OH)(HPO_4)_4]_2\} \cdot 4H_2O$                  | CO              | CH <sub>4</sub>       | 9.39                                                  | 10h       |                  |
| $H\{[Na_2K_4Mn_4(PO_4)(H_2O)_4]_3\{[Mo_6O_{12}(OH)_3(HPO_4)_3(PO_4)]_4[Mn_6(H_2O)_4]\} \cdot 16H_2O$       | CH <sub>4</sub> | CO                    | 17                                                    | 19h       | 6                |
| $H\{[Na_6CoMn_3(PO_4)(H_2O)_4]_3\{[Mo_6O_{12}(OH)_3(HPO_4)_3(PO_4)]_4[Co_{1.5}Mn_{4.5}]\} \cdot 21H_2O$    | CH <sub>4</sub> | CO                    | 40.2                                                  | 23h       |                  |

**Table S9.** The research of reaction conditions.

| entry          | CO ( $\mu\text{mol}$ ) | CH <sub>4</sub> ( $\mu\text{mol}$ ) | selectivity (%) |
|----------------|------------------------|-------------------------------------|-----------------|
| 1 <sup>a</sup> | 32.61                  | 2.35                                | 93.3            |
| 2 <sup>b</sup> | none                   | none                                | -               |
| 3 <sup>c</sup> | 1.43                   | 0.91                                | 61.1            |
| 4 <sup>d</sup> | none                   | none                                | -               |
| 5 <sup>e</sup> | none                   | none                                | -               |
| 6 <sup>f</sup> | none                   | none                                | -               |

<sup>a</sup>Reaction conditions: photocatalyst (10 mg), [Ru(bpy)<sub>3</sub>]Cl<sub>2</sub>·6H<sub>2</sub>O (11.3 mg), solvent (50 mL, MeCN/TEOA, 4/1), CO<sub>2</sub> (1 atm),  $\lambda \geq 420$  nm, 298 K, 8 h reaction time; selectivity =  $(n(\text{CO}))/n(\text{CO} + \text{CH}_4) \times 100\%$ . <sup>b</sup>Dark condition. <sup>c</sup>No catalyst. <sup>d</sup>No [Ru(bpy)<sub>3</sub>]Cl<sub>2</sub>·6H<sub>2</sub>O. <sup>e</sup>No TEOA. <sup>f</sup>Ar replaced CO<sub>2</sub>.

## References

- (1) Y. Y. Liu, Z. H. Wang, J. Yang, B. Liu, Y. Y. Liu and J. F. Ma, *CrystEngComm*, 2011, **13**, 3811-3821.
- (2) F. F. Li, J. F. Ma, S. Y. Song and J. Yang, *Cryst. Growth Des.*, 2006, **6**, 209-215.
- (3) D. Altermatt and I. D. Brown, *Acta Cryst.*, 1985, **41**, 240-244.
- (4) Z. Y. Du, Z. Chen, R. K. Kang, Y. M. Han, J. Ding, J. P. Cao, W. Jiang, M. Fang, H. Mei and Y. Xu, *Inorg. Chem.*, 2020, **59**, 12876–12883.
- (5) J. Du, Y. Y. Ma, X. Xin, H. Na, Y. N. Zhao, H. Q. Tan, Z. G. Han, Y. G. Li and Z. H. Kang, *Chem. Eng.J.* 2020, **398**, 125518.
- (6) S. L. Xie, J. Liu, L. Z. Dong, S. L. Li, Y. Q. Lan and Z. M. Su, *Chem. Sci.*, 2019, **10**, 185-190.
